# Supplementary material for: Lower-limb internal loading and potential consequences for fracture healing
Source: Frontiers journal article supplement (doi:10.3389/fbioe.2023.1284091), 2023-10-12
Supplement: Data_Sheet_1.PDF [file Data_Sheet_1.PDF]

## *Supplementary Material*

### 1 Supplementary Tables

| Subject                      | K1L          | K2L          | K3R          | K5R          | K7L          | K8L          |
|------------------------------|--------------|--------------|--------------|--------------|--------------|--------------|
| Gender                       | m            | m            | m            | m            | f            | m            |
| Age                          | 69           | 78           | 77           | 66           | 79           | 70           |
| Body mass [kg]               | 101          | 91           | 100          | 96           | 67           | 79           |
| Height [cm]                  | 175          | 169          | 173          | 174          | 165          | 175          |
| Time post-op [months]        | 87           | 84           | 76           | 69           | 67           | 64           |
| Tibio-femoral angle [degree] | 3.0<br>varus | 5.0<br>varus | 3.5<br>varus | 1.0<br>varus | 6.5<br>varus | 4.0<br>varus |
| Posterior slope [degree]     | 5            | 11           | 10           | 7            | 7            | 11           |

**Supplementary Table 1.** Overview of patients whose gait was measured for musculoskeletal modelling (Information concerning this data and documentation is available at <https://cams-knee.orthoload.com/>).

| <b>Peak compression<br/>[N]</b>       | <b>FEMUR<br/>max Fz</b> | <b>Change towards<br/>distally (%)</b> | <b>TIBIA<br/>max Fz</b> | <b>Change towards<br/>distally (%)</b> |
|---------------------------------------|-------------------------|----------------------------------------|-------------------------|----------------------------------------|
| 10%                                   | 1787 (229)              | REF                                    | 4126 (996)              | REF                                    |
| 50%                                   | 1886 (424)              | +5.5                                   | 4140 (991)              | +0.3                                   |
| 90%                                   | 2001 (507)              | +12.0                                  | 4179 (989)              | +1.3                                   |
| <b>Peak frontal bending<br/>[Nm]</b>  | <b>FEMUR<br/>max My</b> |                                        | <b>TIBIA<br/>max My</b> |                                        |
| 10%                                   | 97.0 (17.3)             | REF                                    | 36.2 (6.5)              | REF                                    |
| 50%                                   | 65.9 (13.3)             | -32                                    | 27.9 (14.2)             | -23                                    |
| 90%                                   | 48.3 (9.7)              | -50                                    | 12.1 (11.2)             | -67                                    |
| <b>Peak sagittal bending<br/>[Nm]</b> | <b>FEMUR<br/>min Mx</b> |                                        | <b>TIBIA<br/>min Mx</b> |                                        |
| 10%                                   | 9.2 (4.5)               | REF                                    | 139.3 (46.0)            | REF                                    |
| 50%                                   | 30.4 (10.7)             | +230                                   | 117.9 (52.2)            | -15                                    |
| 90%                                   | 38.1 (10.4)             | +314                                   | 57.1 (30.9)             | -59                                    |
| <b>Peak torsion<br/>[Nm]</b>          | <b>FEMUR<br/>min Mz</b> |                                        | <b>TIBIA<br/>max Mz</b> |                                        |
| 10%                                   | 29.7 (9.3)              | REF                                    | 31.5 (12.6)             | REF                                    |
| 50%                                   | 20.1 (4.8)              | -32                                    | 27.7 (10.8)             | -12                                    |
| 90%                                   | 13.2 (4.3)              | -56                                    | 15.4 (5.6)              | -51                                    |

**Supplementary Table 2.** Mean (standard variation) of extremal loading during the stance phase of walking as function of the relative location along the extra-articular part of bone shaft (proximal to distal).

| Model                          | A       | B        | C      | R <sup>2</sup> | RSME   |
|--------------------------------|---------|----------|--------|----------------|--------|
| <b>TIBIA at 50% shaft</b>      |         |          |        |                |        |
| max Fz = A + B * F80           | 2.47    | 0.16     | -      | <b>0.86</b>    | 0.43   |
| max My = A + B * HKA           | -0.0072 | 0.010    | -      | <b>0.63</b>    | 0.013  |
| min Mx = A + B * F80           | -0.042  | -0.007   | -      | <b>0.85</b>    | 0.019  |
| max Mz = A + B * F80           | 0.011   | 0.0013   | -      | <b>0.70</b>    | 0.0057 |
| <b>FEMUR at 10% shaft</b>      |         |          |        |                |        |
| min Mz = A + B * F80 + C * HKA | -0.026  | -0.00086 | 0.0017 | <b>0.67</b>    | 0.0039 |
| min Mz = A + B * VEL + C * HKA | -0.0065 | 0.035    | 0.0013 | <b>0.70</b>    | 0.0027 |

**Supplementary Table 3.** Results of linear regressions between anatomy, kinematics and peak bone loading. HKA [°]: hip-knee-angle; F80 [°]: knee flexion at 80% stance phase; VEL [m/s]: mean forward speed during stance phase; Mx [BWm]: peak bending in the sagittal plane (negative: ends bent to posterior); My [BWm]: peak bending in the frontal plane (positive: ends bent to medial); Fz [BW]: peak compression.

## 2 Supplementary Figures

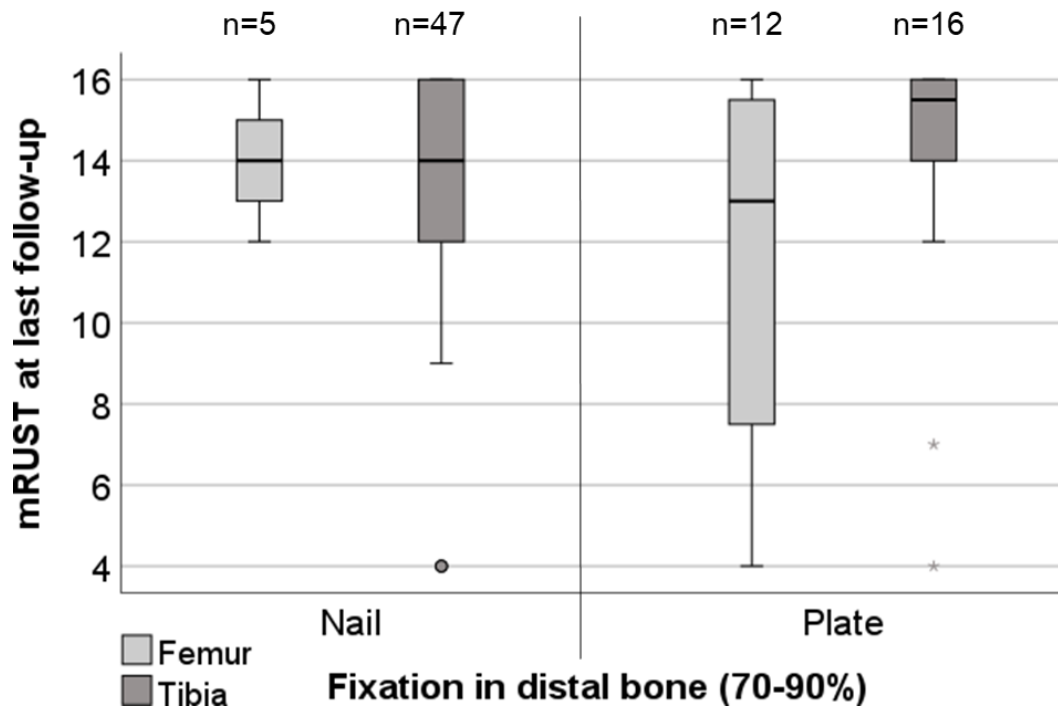

**Supplementary Figure 1:** Healing outcome for distal bone fractures according to treatment and bone.

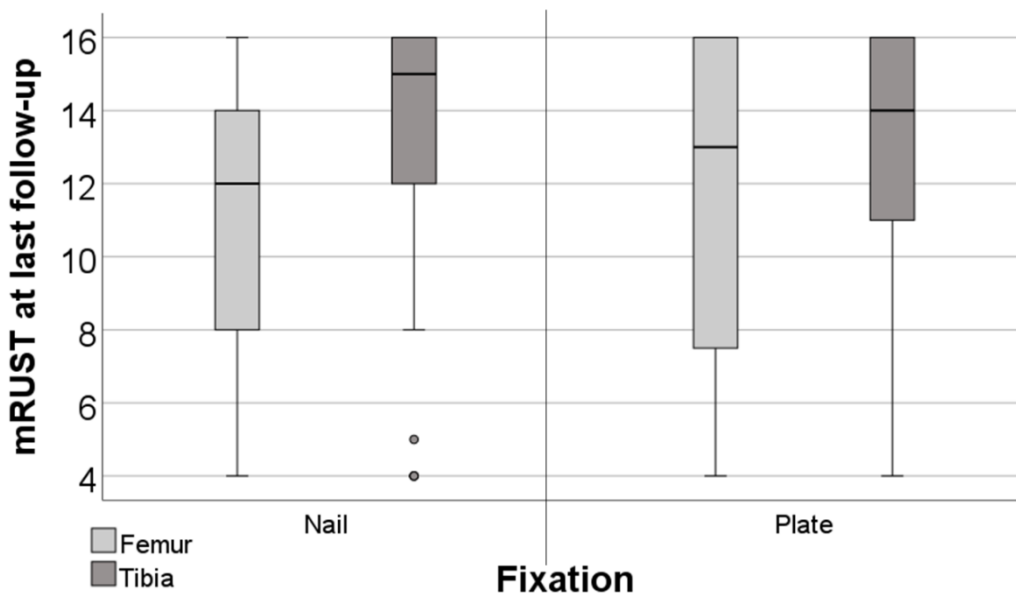

**Supplementary Figure 2:** Healing outcome for fractures according to treatment and bone.
